# Supplementary material for: An all-day solar-driven vapor generator via photothermal and Joule-heating effects
Source: Royal Society of Chemistry journal article supplement (doi:10.1039/d0ta08329a), 2020-01-01
Supplement: d0ta08329a1.pdf [file d0ta08329a1.pdf]

Supporting Information for:

## **All-day solar-driven vapor generator via photothermal and Joule-heating effect**

Yang Guo, Yujin Sui, Jiajie Zhang, Zaisheng Cai and Bi Xu\*

National Engineering Research Center for Dyeing and Finishing of Textiles, College of Chemistry, Chemical Engineering and Biotechnology, Donghua University, 2999 North Renmin Road, Shanghai, 201620 China

\* Corresponding author

E-mail address: xubi@dhu.edu.cn (Bi Xu)

Tel: +86 21 67792617; Fax: +86 21 67792608.

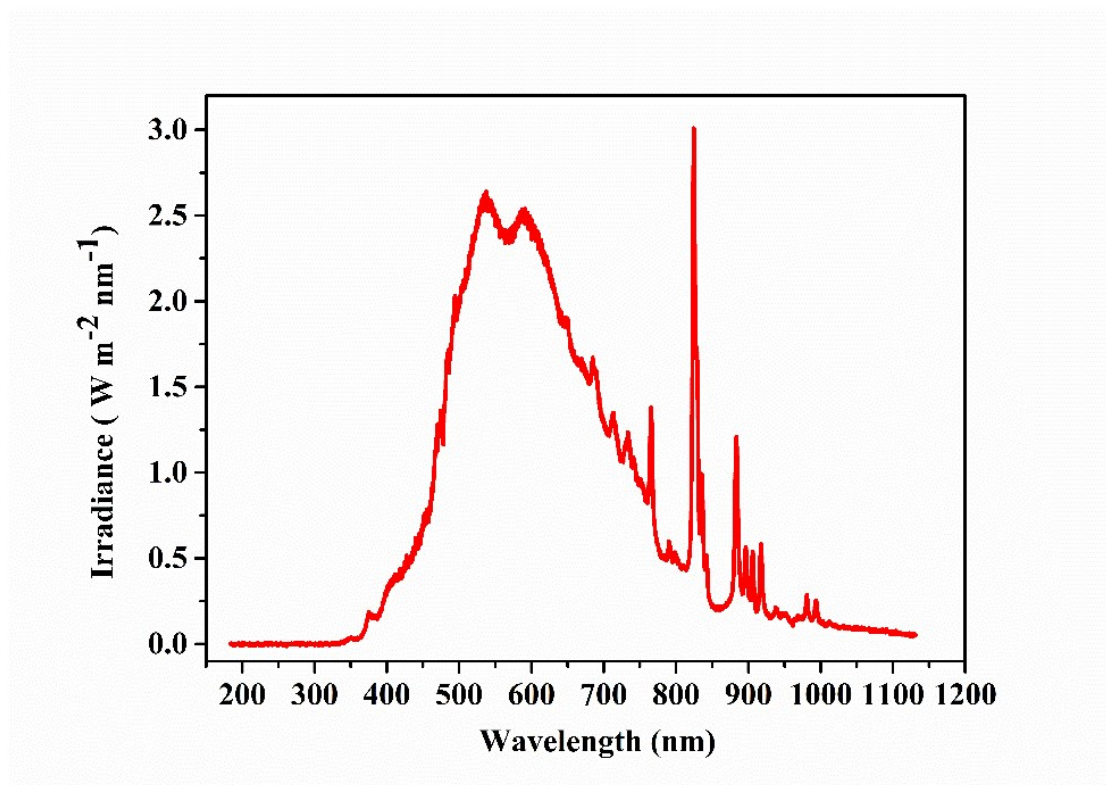

**Fig. S1** The spectrum of the Xenon light harnessed in the experiment.

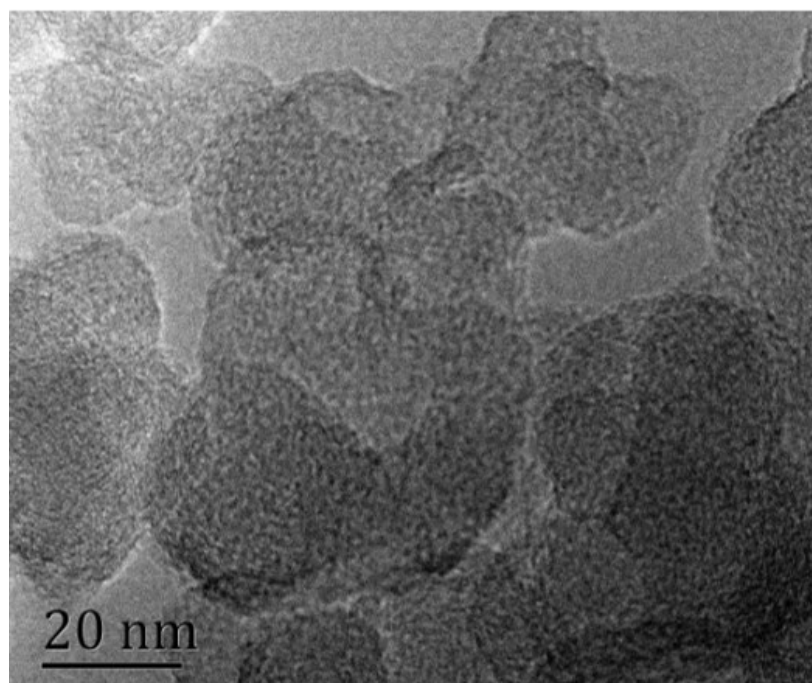

**Fig. S2 (a)** TEM image of CB dispersion.

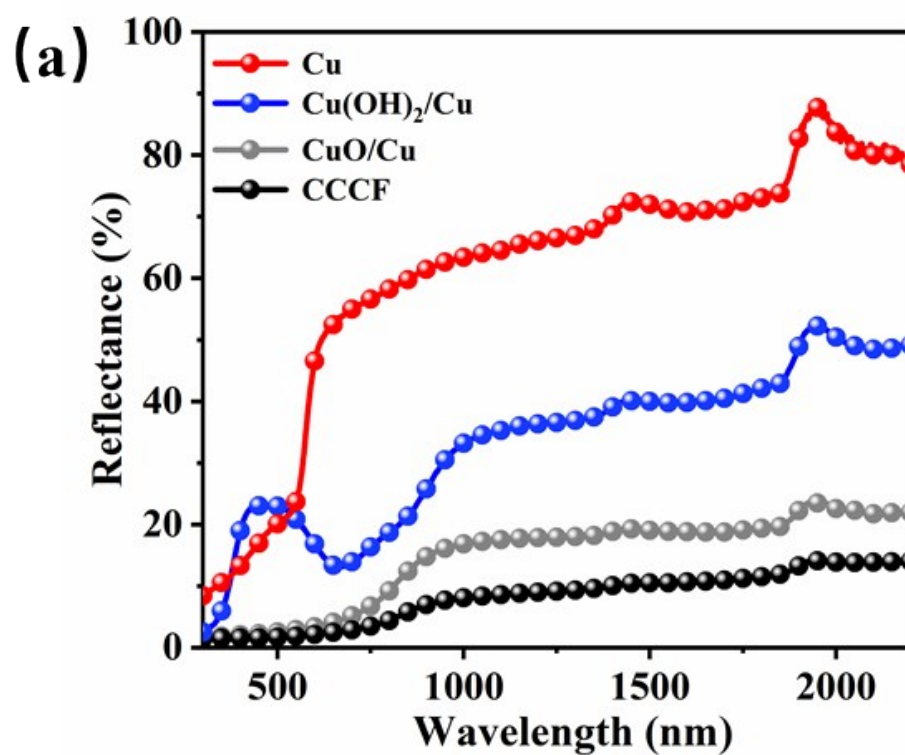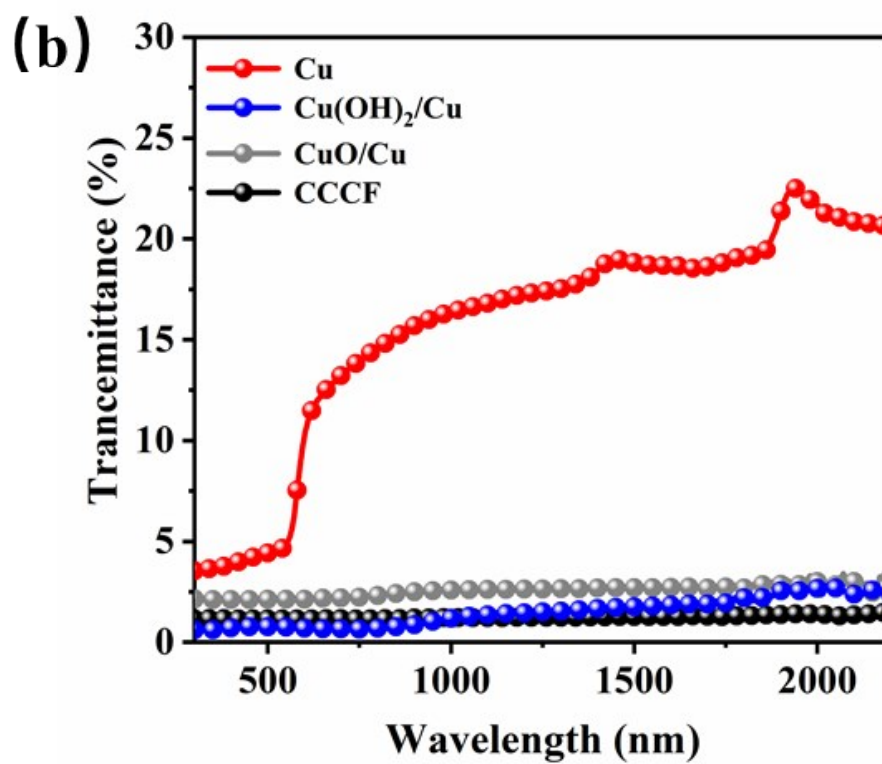

Fig. S3 (a) Reflectance and (b) transmittance spectra of different foams.

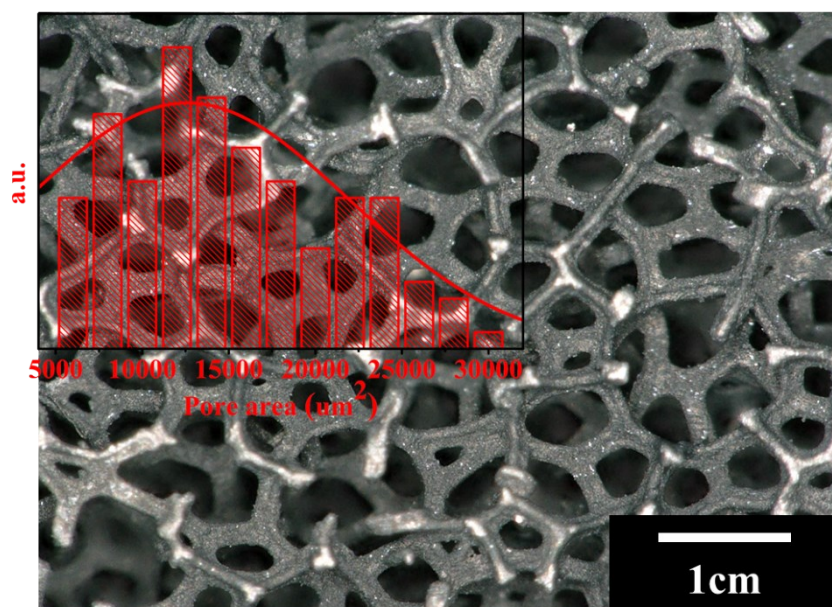

**Fig. S4** The digital picture of CuO/Cu-CB foam and diameter distribution of inherent pores.

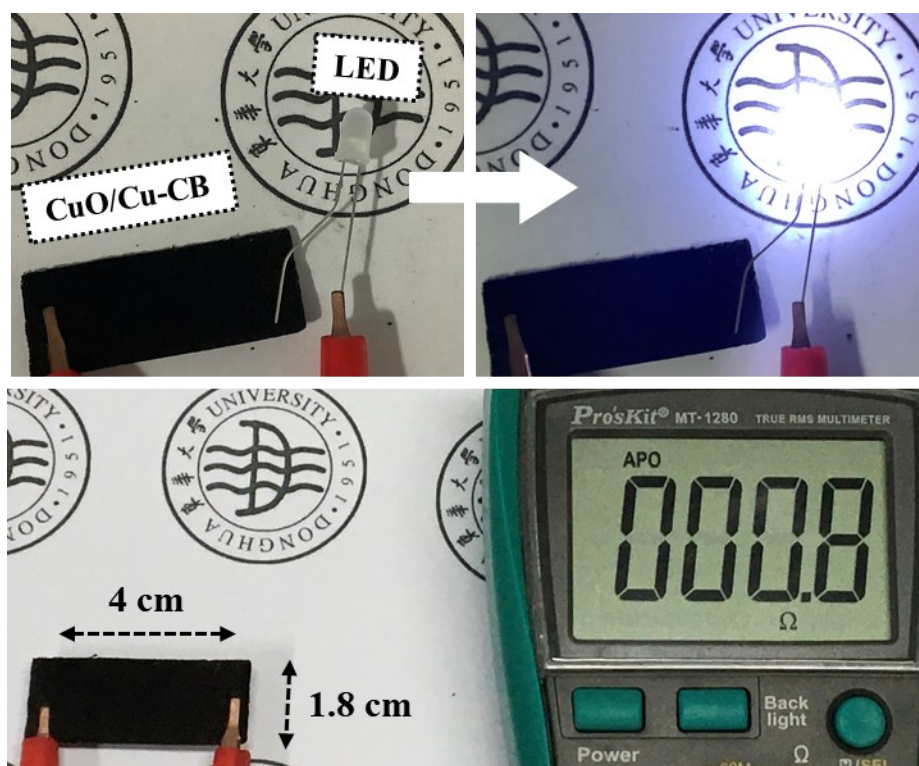

**Fig. S5** The circuit of LED bulb and resistance measurement of CuO/Cu-CB foam (40 mm × 18 mm × 1.6 mm)

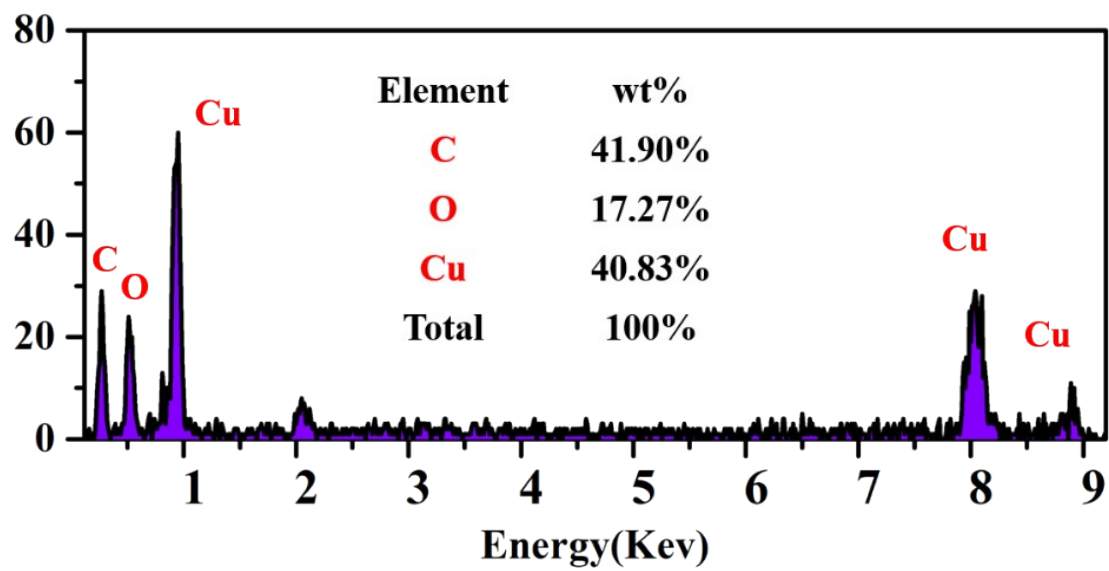

**Fig. S6** EDXS spectra acquired over the CuO/Cu-CB foam surface.



## $H_{LV}$ value measurement

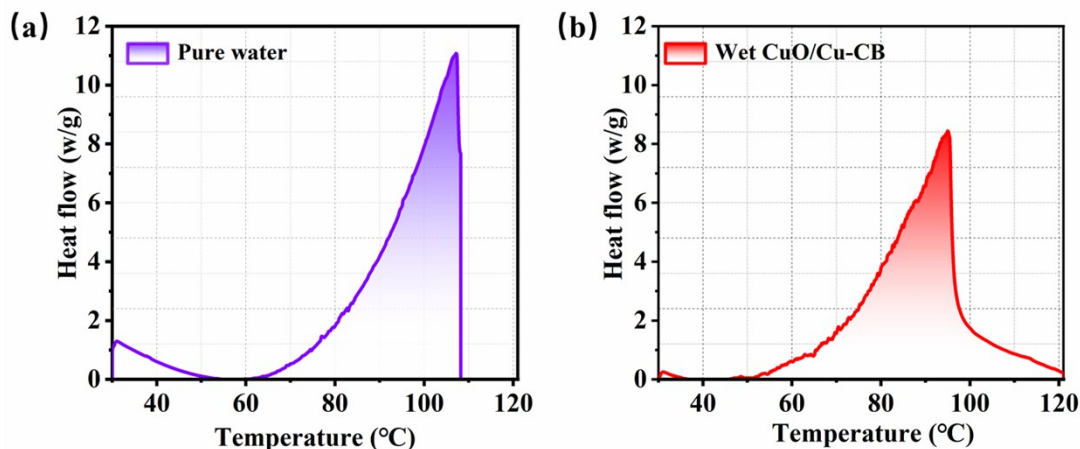

**Fig. S7** DSC curve of (a) pure water and (b) wet CuO/Cu-CB

During the DSC measurement, the sample was measured with a linear heating rate of  $5\text{ K min}^{-1}$  over the temperature range of  $30^\circ\text{C}$  to  $120^\circ\text{C}$ . When calculating the integral value, the abscissa needed to be switched to time (s). As shown in Fig. S3, the integral range included all color areas. As shown in Table S1, the measured latent heat of the pure water and water loaded in the black flocked fabric were  $2320.9\text{ J g}^{-1}$  and  $1991.8\text{ J g}^{-1}$ , respectively.

**Table S1** Summary of DSC measurement result

|               | Total mass<br>(mg) | Water (mass) | Integral value<br>(mJ mg <sup>-1</sup> ) | Latent heat of<br>water (J g <sup>-1</sup> ) |
|---------------|--------------------|--------------|------------------------------------------|----------------------------------------------|
| Pure water    | 6.24               | 6.24         | 2320.9                                   | 2320.9                                       |
| Wet CuO/Cu-CB | 12                 | 6.12         | 1015.8                                   | 1991.8                                       |

$H_{LV}$  is the total enthalpy that includes latent heat ( $1991.8\text{ J g}^{-1}$ ) and sensible heat ( $117.6\text{ J g}^{-1}$ ).

## Heat loss analysis

### (a) Radiation loss

The radiation loss was calculated through Stefan-Boltzmann equation.

$$\phi = \varepsilon A \sigma (T_1^4 - T_2^4) \quad (1)$$

where  $\Phi$  denotes the heat flux,  $\varepsilon$  denotes emissivity of CuO/Cu-CB foam (0.8),  $A$  is the evaporation surface area,  $\sigma$  is the Stefan-Boltzmann constant ( $5.67 \times 10^{-8} \text{ W m}^{-2} \text{ K}^{-4}$ ),  $T_1$  is the temperature of the absorber under  $1 \text{ kW m}^{-2}$  solar illumination (316 K), and  $T_2$  is the atmosphere temperature (298 K). The calculated radiation loss is  $\sim 9.46\%$ .

### (b) Conduction loss

The conduction loss was acquired using the following equation.

$$Q = Cm\Delta T \quad (2)$$

where  $Q$  demonstrate the heat energy,  $C$  indicate the specific heat capacity of water ( $4.2 \text{ J g}^{-1} \text{ }^\circ\text{C}^{-1}$ ),  $m$  denotes the bulk water weight (19.41 g) and  $\Delta T$  is the temperature change ( $2.5 \text{ }^\circ\text{C}$ ) of the bulk water after 1 h evaporation ( $2.5 \text{ }^\circ\text{C}$ ). Therefore, the calculated conduction heat loss was  $\sim 15.73 \%$ .

### (c) Convection loss

The convection loss was obtained according to equation 3.

$$\phi = hA\Delta T \quad (3)$$

where  $\phi$  represents the heat flux,  $h$  is the convection heat transfer coefficient ( $5 \text{ W m}^{-2} \text{ K}^{-1}$ ),  $A$  is evaporation surface area,  $\Delta T$  is the temperature difference (17 K) between the CuO/Cu-CB foam surface and surroundings. Therefore, the calculated convection loss is  $\sim 8.5 \%$ .

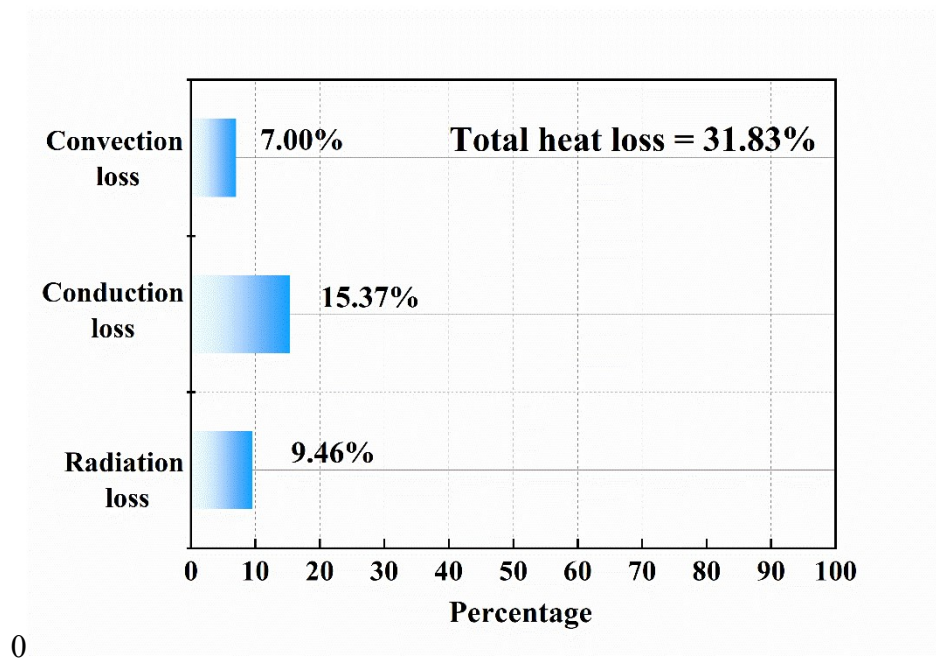

Fig. S8 Different heat loss ratio.

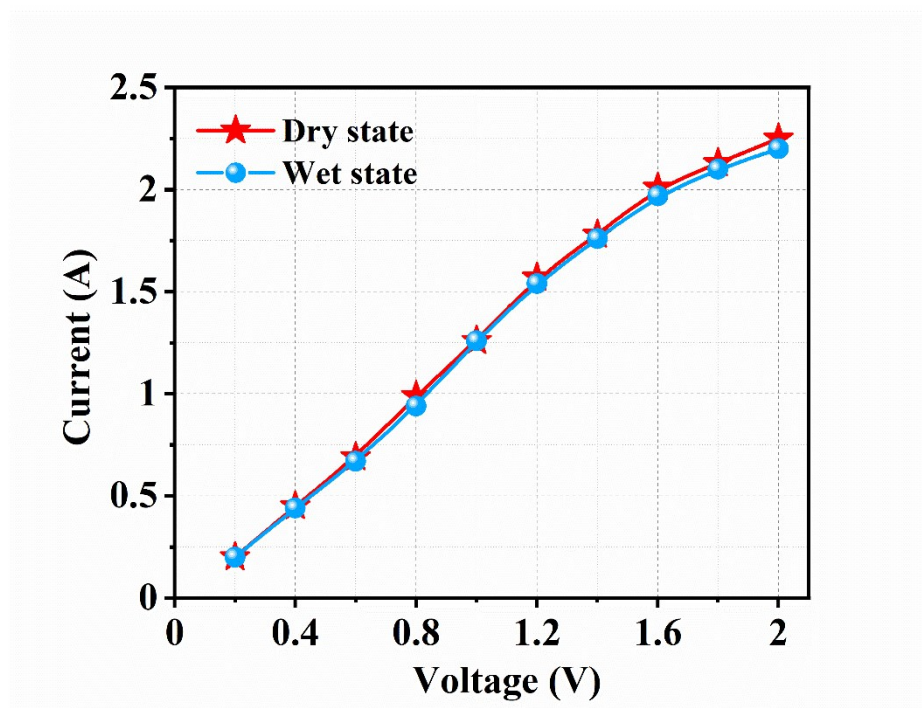

Fig. S9 The CV curve of CuO/Cu-CB foam in wet and dry condition



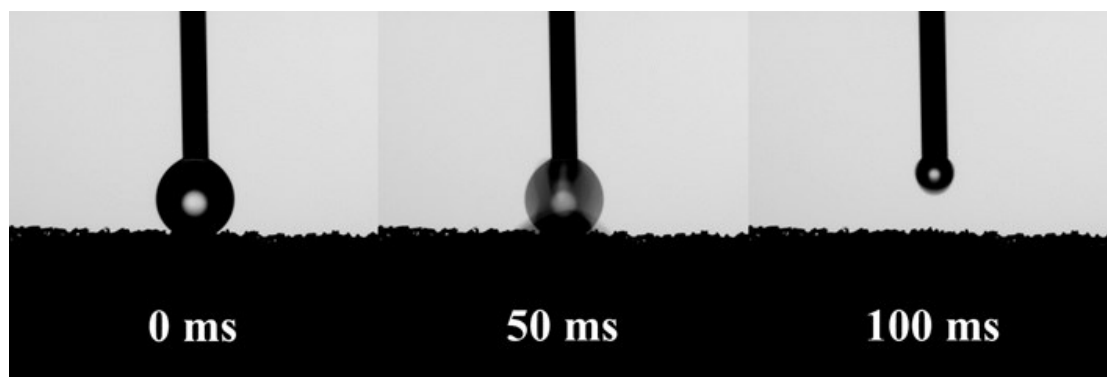

Fig. S10 The time-lapse WCAs of CuO/Cu-CB during cycling test.

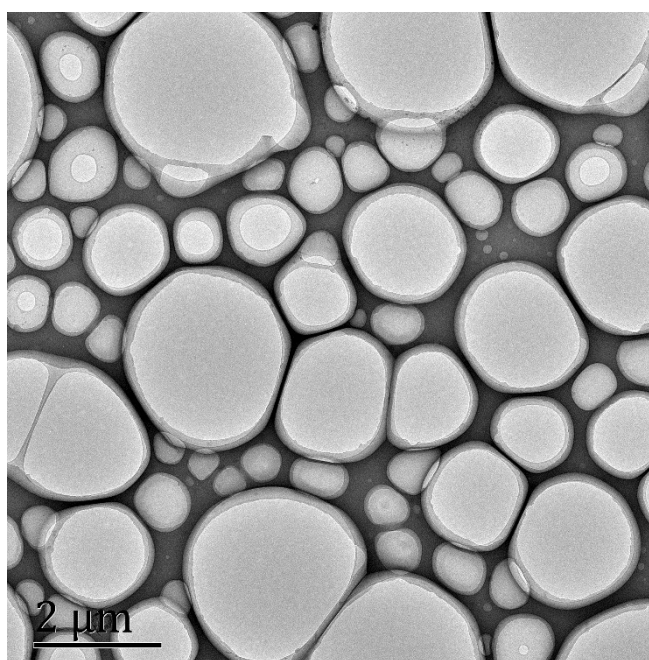

Fig. S11 TME image of bulk water.

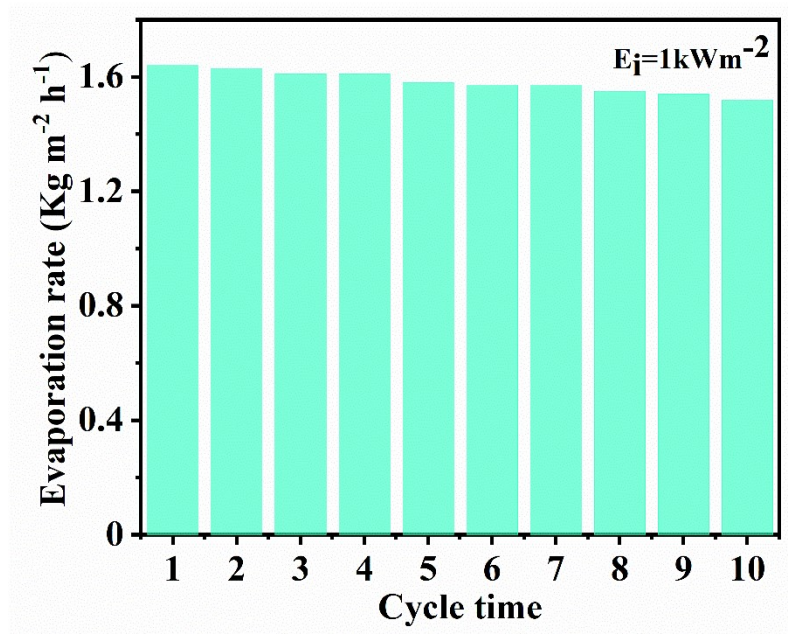

Fig. S12 The cycling test of evaporation rate in MB solution.
